# Supplementary material for: Mass Spectrometry-Based Proteomics for Discovering Salivary Biomarkers in Periodontitis: A Systematic Review
Source: MDPI journal article supplement (doi:10.3390/ijms241914599), 2023-09-27
Supplement: s1 [file s1]

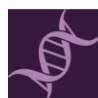

## 2. Materials and Methods

### 2.3. Literature search

**Table S1.** Literature search strategies.

| Databases<br>(Start date) | Search strategies<br>(Search end date: April 31, 2023)                                                                                                                                                                                                                                                                                                                                        |
|---------------------------|-----------------------------------------------------------------------------------------------------------------------------------------------------------------------------------------------------------------------------------------------------------------------------------------------------------------------------------------------------------------------------------------------|
| PubMed<br>(1946)          | ((("saliva"[MeSH Terms]) OR ("saliva"[All Fields]) OR ("salivary"[All Fields])) AND (((((((("proteomics"[MeSH Terms]) OR ("proteome"[MeSH Terms]) OR ("mass spectrometry"[MeSH Terms])) OR ("proteomics"[All Fields]) OR ("proteomic"[All Fields]) OR ("proteome"[All Fields]) OR ("mass spectrometry"[All Fields])))) AND (("periodontitis"[MeSH Terms]) OR ("periodontitis"[All Fields])))) |
| Web of Science<br>(1956)  | ((TS=(proteomics)) OR TS=(proteome)) OR TS=(mass spectrometry)) AND TS=(periodontitis) AND ((TS=(saliva)) OR TS=(salivary))                                                                                                                                                                                                                                                                   |

**Table S2.** Case and control definition for all shortlisted case-control studies (n = 13).

| Study                          | Case                                                                                                                                                                                                                              | Control                                                                                                                                                              |
|--------------------------------|-----------------------------------------------------------------------------------------------------------------------------------------------------------------------------------------------------------------------------------|----------------------------------------------------------------------------------------------------------------------------------------------------------------------|
| Wu et al.<br>2009 [32]         | <b>AP:</b> Age < 30 years; ≥ 3 teeth affected in addition to first molar and incisor; generalized interproximal attachment loss on affected teeth.                                                                                | < 10% BOP; PPD < 3 mm; < 1% of sites with CAL > 2mm; no radiographic bone loss.                                                                                      |
| Gonçalves et al.<br>2010 [39]  | <b>CP:</b> > 35 years; ≥ six sites on different teeth with BOP, PPD > 6 mm, and CAL > 5 mm.                                                                                                                                       | < 10% BOP; PPD < 3 mm.                                                                                                                                               |
| Kim et al.<br>2010 [40]        | <b>AP:</b> CAL > 5 mm in ≥ 8 teeth; ≥ 3 teeth affected in addition to first molar and incisor.<br><b>CP:</b> CAL > 5 mm with BOP in all four quadrants; no evidence of rapid progression.                                         | No evidence of CAL, BOP, or radiographic bone loss.                                                                                                                  |
| Salazar et al.<br>2013 [33]    | <b>CP:</b> BOP > 10%; PPD ≥ 5 mm at ≥ 2 sites; PPD ≥ 4 mm at ≥ 40% teeth.                                                                                                                                                         | BOP < 30%; maximum PPD ≤ 3 mm.                                                                                                                                       |
| Mertens et al.<br>2018 [41]    | American Academy of Periodontology classification criteria, no details reported.                                                                                                                                                  |                                                                                                                                                                      |
| Bostanci et al.<br>2018 [42]   | <b>AP:</b> CAL > 5 mm and PPD > 6 mm in ≥ 8 teeth; ≥ 3 teeth affected in addition to first molar and incisor.<br><b>CP:</b> CAL > 5 mm and PPD > 6 mm in ≥ 4 non-adjacent teeth; > 50% radiographic bone loss in ≥ two quadrants. | No sites with PPD > 3 mm and CAL > 2 mm; no evidence of radiographic bone loss.                                                                                      |
| Grant et al.<br>2019 [43]      | <b>Periodontal disease:</b> Radiographic bone loss ≥ 1/3 of the root length and/or PPD > 5 mm, and BOP > 20%.                                                                                                                     | No tooth with PPD > 5 mm or Radiographic bone loss ≥ 1/3 of the root length.                                                                                         |
| Tang et al.<br>2019 [44]       | <b>CP:</b> CAL ≥ 1 mm; PPD ≥ 4 mm; radiographic bone loss; > 30% of teeth involved.                                                                                                                                               | No sites with CAL or PPD > 3 mm; BOP ≤ 20%; no radiographic bone loss.                                                                                               |
| Shin et al.<br>2019 [45]       | <b>Periodontitis:</b> Presence of proximal bone of ≥ 3 mm in ≥ 2 non-adjacent teeth.                                                                                                                                              | No proximal bone of ≥ 3 mm in ≥ 2 non-adjacent teeth.                                                                                                                |
| Hartenbach et al.<br>2020 [46] | <b>CP:</b> > 10% of teeth with PPD and/or CAL ≥ 5 mm and BOP.                                                                                                                                                                     | < 10% sites with BOP, no PPD or CAL > 3 mm; < 5% sites of PPD or CAL = 4 mm without BOP was allowed.                                                                 |
| Antezack et al.<br>2020 [47]   | <b>Periodontitis:</b> Inter-dental CAL detectable at ≥ 2 non-adjacent teeth or buccal or oral CAL ≥ 3 mm with PPD ≥ 3 mm at ≥ 2 teeth.                                                                                            | BOP < 10%; PPD < 3 mm; no CAL.                                                                                                                                       |
| Grant et al.<br>2022 [27]      | <b>Birmingham cohort:</b><br>Stage I/II periodontitis: interproximal CAL of 2-4 mm at > 8 teeth with PPD of 5-7 mm; Stage III/IV: interproximal CAL > 5 mm at 12 teeth and PPD > 7 mm.<br><b>Newcastle cohort:</b>                | <b>Birmingham cohort:</b><br>No sites of interproximal CAL; no sites with PPD > 3 mm; < 10% sites with GI of 1 and no sites with GI of 2 or 3; < 10% sites with BOP. |

Stage I/II periodontitis: interproximal PPD of 5-7 mm (equating to approximately 2-4 mm CAL) at  $\geq 8$  teeth; Stage III/IV: interproximal PPD  $> 7$  mm (equating to approximately  $\geq 5$  mm CAL) at  $\geq 12$  teeth, BOP scores  $> 30\%$ .

**Newcastle cohort:**

No sites with interproximal CAL; PPD  $\leq 3$  mm in all sites (but would allow up to four 4 mm pockets at distal of last standing molars);  $\leq 10\%$  sites with mGI of  $\geq 2.0$ ;  $< 10\%$  sites with BOP.

Casarin et al.  
2023 [34]

$< 35$  years; PPD  $\geq 5$  mm at  $\geq 8$  teeth and PPD  $\geq 7$  mm at  $\geq 2$  teeth; CAL  $> 5$  mm in three teeth other than the first molars and incisors.

No history of CAL, PPD  $< 4$  mm, no radiographic bone loss,  $\geq 20$  teeth present.

AP: aggressive periodontitis; BOP: bleeding on probing; CAL: clinical attachment loss; CP: chronic periodontitis; GI: gingival index; PPD: probing pocket depth.

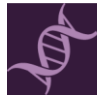

2.5. Risk of bias assessment

**Table S3.** Quality assessment by the Newcastle Ottawa Scale for all shortlisted case-control studies (n = 13).

| Study                       | Selection       |                                 |                       |                        | Comparability | Exposure                  |                   | Total score |
|-----------------------------|-----------------|---------------------------------|-----------------------|------------------------|---------------|---------------------------|-------------------|-------------|
|                             | Case definition | Representativeness of the cases | Selection of controls | Definition of controls |               | Ascertainment of exposure | Non-response rate |             |
| Wu et al. 2009 [32]         | *               | *                               | *                     | *                      | *             |                           | *                 | 6           |
| Gonçalves et al. 2010 [39]  | *               |                                 | *                     | *                      | *             |                           | *                 | 6           |
| Kim et al. 2010 [40]        | *               |                                 | *                     | *                      | **            |                           | *                 | 6           |
| Salazar et al. 2013 [33]    | *               | *                               | *                     | *                      | **            |                           | *                 | 7           |
| Mertens et al. 2018 [41]    | *               | *                               | *                     | *                      | *             |                           | *                 | 6           |
| Bostanci et al. 2018 [42]   | *               |                                 | *                     | *                      | *             |                           | *                 | 5           |
| Grant et al. 2019 [43]      | *               |                                 | *                     | *                      | *             |                           | *                 | 5           |
| Tang et al. 2019 [44]       | *               | *                               | *                     | *                      | *             |                           | *                 | 6           |
| Shin et al. 2019 [45]       | *               | *                               | *                     | *                      | **            |                           | *                 | 7           |
| Hartenbach et al. 2020 [46] | *               |                                 | *                     | *                      | *             |                           | *                 | 5           |
| Antezack et al. 2020 [47]   | *               | *                               | *                     | *                      | *             |                           | *                 | 6           |
| Grant et al. 2022 [27]      | *               |                                 | *                     | *                      | **            |                           | *                 | 6           |
| Casarin et al. 2023 [34]    | *               |                                 | *                     | *                      | **            |                           | *                 | 6           |



**Table S4.** Risk of bias assessment by QUADAS-2 for all shortlisted diagnostic studies (n = 13).

4

| Study                       | Risk of bias      |            |                    |                 |
|-----------------------------|-------------------|------------|--------------------|-----------------|
|                             | Patient selection | Index test | Reference standard | Flow and timing |
| Wu et al. 2009 [32]         | High              | High       | Low                | Low             |
| Gonçalves et al. 2010 [39]  | High              | High       | Low                | Low             |
| Kim et al. 2010 [40]        | High              | High       | Low                | Low             |
| Salazar et al. 2013 [33]    | High              | High       | Low                | Low             |
| Mertens et al. 2018 [41]    | High              | High       | Low                | Low             |
| Bostanci et al. 2018 [42]   | High              | Low        | Low                | Low             |
| Grant et al. 2019 [43]      | High              | High       | Low                | Low             |
| Tang et al. 2019 [44]       | High              | High       | Low                | Low             |
| Shin et al. 2019 [45]       | High              | High       | Low                | Low             |
| Hartenbach et al. 2020 [46] | High              | High       | Low                | Low             |
| Antezack et al. 2020 [47]   | High              | Low        | Low                | Low             |
| Grant et al. 2022 [27]      | High              | High       | Low                | Low             |
| Casarin et al. 2023 [34]    | High              | High       | Low                | Low             |

**Table S5.** Quality assessment by NIH quality assessment tool for before-after (pre-post) studies with no control group (n = 2).

5

| Study                  | Q1 | Q2 | Q3 | Q4 | Q5 | Q6 | Q7 | Q8 | Q9 | Q10 | Q11 | Q12 | Total score |
|------------------------|----|----|----|----|----|----|----|----|----|-----|-----|-----|-------------|
| Haigh et al. 2010 [48] | Y  | Y  | N  | Y  | N  | Y  | Y  | N  | Y  | Y   | N   | NA  | 7           |
| Yuan et al. 2022 [49]  | Y  | Y  | N  | Y  | N  | Y  | Y  | N  | Y  | Y   | N   | NA  | 7           |

N: no; NA; not applicable; NIH, National Institutes of Health; Y: yes.

**Q1.** Was the study question or objective clearly stated?

**Q2.** Were eligibility/selection criteria for the study population prespecified and clearly described?

**Q3.** Were the participants in the study representative of those who would be eligible for the test/service/intervention in the general or clinical population of interest?

**Q4.** Were all eligible participants that met the prespecified entry criteria enrolled?

**Q5.** Was the sample size sufficiently large to provide confidence in the findings?

**Q6.** Was the test/service/intervention clearly described and delivered consistently across the study population?

**Q7.** Were the outcome measures prespecified, clearly defined, valid, reliable, and assessed consistently across all study participants?

**Q8.** Were the people assessing the outcomes blinded to the participants' exposures/interventions?

**Q9.** Was the loss to follow-up after baseline 20% or less? Were those lost to follow-up accounted for in the analysis?

**Q10.** Did the statistical methods examine changes in outcome measures from before to after the intervention? Were statistical tests done that provided p values for the pre-to-post changes?

**Q11.** Were outcome measures of interest taken multiple times before the intervention and multiple times after the intervention (i.e., did they use an interrupted time-series design)?

**Q12.** If the intervention was conducted at a group level (e.g., a whole hospital, a community, etc.) did the statistical analysis take into account the use of individual-level data to determine effects at the group level?

**Table S6..** Differentially expressed (descending order of absolute fold change) unstimulated or stimulated whole salivary proteins detectable by mass spectrometry-based proteomics.

24

25

26
