# Supplementary material for: Mass Spectrometry-Based Proteomics for Discovering Salivary Biomarkers in Periodontitis: A Systematic Review
Source: MDPI journal article supplement (doi:10.3390/ijms241914599), 2023-09-27
Supplement: s1 [file s1]

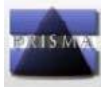

## PRISMA 2020 for Abstracts Checklist

| Section and Topic       | Item # | Checklist item                                                                                                                                                                                                                                                                                        | Reported (Yes/No)                                       |
|-------------------------|--------|-------------------------------------------------------------------------------------------------------------------------------------------------------------------------------------------------------------------------------------------------------------------------------------------------------|---------------------------------------------------------|
| <b>TITLE</b>            |        |                                                                                                                                                                                                                                                                                                       |                                                         |
| Title                   | 1      | Identify the report as a systematic review.                                                                                                                                                                                                                                                           | Yes                                                     |
| <b>BACKGROUND</b>       |        |                                                                                                                                                                                                                                                                                                       |                                                         |
| Objectives              | 2      | Provide an explicit statement of the main objective(s) or question(s) the review addresses.                                                                                                                                                                                                           | Yes, the 3 <sup>rd</sup> sentence                       |
| <b>METHODS</b>          |        |                                                                                                                                                                                                                                                                                                       |                                                         |
| Eligibility criteria    | 3      | Specify the inclusion and exclusion criteria for the review.                                                                                                                                                                                                                                          | Yes, the 5 <sup>th</sup> sentence                       |
| Information sources     | 4      | Specify the information sources (e.g. databases, registers) used to identify studies and the date when each was last searched.                                                                                                                                                                        | Yes, sentences 3 <sup>rd</sup> and 4 <sup>th</sup> .    |
| Risk of bias            | 5      | Specify the methods used to assess risk of bias in the included studies.                                                                                                                                                                                                                              | Yes, the 6 <sup>th</sup> sentence                       |
| Synthesis of results    | 6      | Specify the methods used to present and synthesise results.                                                                                                                                                                                                                                           | Yes, sentences 7 <sup>th</sup> and 8 <sup>th</sup> .    |
| <b>RESULTS</b>          |        |                                                                                                                                                                                                                                                                                                       |                                                         |
| Included studies        | 7      | Give the total number of included studies and participants and summarise relevant characteristics of studies.                                                                                                                                                                                         | Yes, the 8 <sup>th</sup> sentence                       |
| Synthesis of results    | 8      | Present results for main outcomes, preferably indicating the number of included studies and participants for each. If meta-analysis was done, report the summary estimate and confidence/credible interval. If comparing groups, indicate the direction of the effect (i.e. which group is favoured). | Yes, the 8 <sup>th</sup> and 10 <sup>th</sup> sentences |
| <b>DISCUSSION</b>       |        |                                                                                                                                                                                                                                                                                                       |                                                         |
| Limitations of evidence | 9      | Provide a brief summary of the limitations of the evidence included in the review (e.g. study risk of bias, inconsistency and imprecision).                                                                                                                                                           | Yes, the 9 <sup>th</sup> and 10 <sup>th</sup> sentences |
| Interpretation          | 10     | Provide a general interpretation of the results and important implications.                                                                                                                                                                                                                           | Yes, sentences 12 <sup>th</sup> and 13 <sup>th</sup>    |
| <b>OTHER</b>            |        |                                                                                                                                                                                                                                                                                                       |                                                         |
| Funding                 | 11     | Specify the primary source of funding for the review.                                                                                                                                                                                                                                                 | Provided: The last sentence                             |
| Registration            | 12     | Provide the register name and registration number.                                                                                                                                                                                                                                                    | Provided: The last sentence.                            |

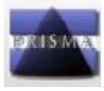

## PRISMA 2020 for Abstracts Checklist

*From:* Page MJ, McKenzie JE, Bossuyt PM, Boutron I, Hoffmann TC, Mulrow CD, et al. The PRISMA 2020 statement: an updated guideline for reporting systematic reviews. BMJ 2021;372:n71. doi: 10.1136/bmj.n71

For more information, visit: <http://www.prisma-statement.org/>
