# Supplementary material for: Mass Spectrometry-Based Proteomics for Discovering Salivary Biomarkers in Periodontitis: A Systematic Review
Source: Int J Mol Sci. 2023 Sep 27;24(19):14599. doi: 10.3390/ijms241914599 (PMC10572407; doi:10.3390/ijms241914599)
Supplement: Supplementary file 1 [file ijms-24-14599-s001.zip]

Archive with 4 entries (4 files):
- ijms-2560461-supplementary.pdf
- PRISMA_2020_abstract_checklist.pdf
- PRISMA_2020_checklist.pdf
- Table S6. Differentially expressed (descending order of absolute fold change) unstimulated or stimulated whole salivary proteins detectable by mass spectrometry-based proteomics..xlsx
