# Supplementary material for: Mass Spectrometry-Based Proteomics for Discovering Salivary Biomarkers in Periodontitis: A Systematic Review
Source: Int J Mol Sci. 2023 Sep 27;24(19):14599. doi: 10.3390/ijms241914599 (PMC10572407; doi:10.3390/ijms241914599)
Supplement: Supplementary file 1 [file ijms-24-14599-s001.zip › Table S6. Differentially expressed (descending order of absolute fold change) unstimulated or stimulated whole salivary proteins detectable by mass spectrometry-based proteomics..xlsx]

## Sheet: AP_UWS
Wu et al. 2009 (up) [32]	Wu et al. 2009 (down) [32]	Kim et al. 2010 （up) [40]	Kim et al. 2010 (down) [40]	Mertens et al. 2018 (up) [41]	Mertens et al. 2018 (down) [41]	Bostanci et al. 2018 (up) [42]	Bostanci et al. 2018 (down) [42]	Casarin et al. 2023 (up) [34]	Casarin et al. 2023 (down) [34]
PLUNC2	elongation factor 2	S100A9	cystatin SN	hemopexin	nil reported	Ras GTPase-activating-like protein IQGAP1	Extracellular glycoprotein lacritin	Fibrinogen gamma chain, Isoform of P02679	Glutathione S-transferase P, Isoform of P09211
serum albumin	carbonic anhydrase 6	serum albumin		fibrinogen α chain		Hemoglobin subunit alpha	Isoform 1 of Alpha-1-antichymotrypsin	Lactoperoxidase, Isoform of P22079	Keratin, type II cytoskeletal 4
ig kappa 2 chain c region	14-3-3 sigma	LCN1				Glutaredoxin-1	Calmodulin-like protein 5	Profilin-1 (Fragment), Isoform of P07737	Leukocyte elastase inhibitor
zinc-alpha 2 glycoprotein	lactoferrin					Protein S100-A4	Isoform 1 of Liver carboxylesterase 1	Heat shock protein beta-1, Isoform of P04792	Alpha-2-macroglobulin
ig alpha 2 chain c region						Hypoxanthine-guanine phosphoribosyltransferase	Interleukin-1 family member 6	Keratin, type I cytoskeletal 10	Immunoglobulin J chain
vitamin d-binding protein						Serpin B10	Antileukoproteinase	Keratin, type II cytoskeletal 1	Isoform Long of Glucose-6-phosphate 1-dehydrogenase, Isoform of P11413
alpha-amylase						Band 3 anion transport protein	Annexin A1	Alpha-enolase	Hemopexin
						Proteasome activator complex subunit 2	Isoform 1 of Extracellular matrix protein 1	Fibrinogen beta chain, Isoform of P02675	Actin, cytoplasmic 1
						Coactosin-like protein	Isoform 1 of Alpha-1-antitrypsin	Submaxillary gland androgen-regulated protein 3B	Peptidyl-prolyl cis-trans isomerase, Isoform of P62937
						Actin, alpha cardiac muscle 1	Proline-rich protein 3	Ig mu chain C region (Fragment), Isoform of P01871	Lactotransferrin (Fragment), Isoform of P02788
						Isoform Short of Glucose-6-phosphate 1-dehydrogenase	Isoform 1 of Carboxylesterase 2	Hemoglobin subunit beta	Ig alpha-1 chain C region
						Profilin-1	Cellular retinoic acid-binding protein 2	Apolipoprotein A-I, Isoform of P02647	Keratin, type I cytoskeletal 13, Isoform of P13646
						Actin-related protein 2/3 complex subunit 1B	Histatin-1	Alpha-1-antitrypsin, Isoform of P01009,	Ig alpha-2 chain C region (Fragment), Isoform of P01877
						Glutathione S-transferase omega-1	Elafin	Keratin, type I cytoskeletal 9	Cystatin-S
						Isoform 1 of Adenylyl cyclase-associated protein 1	Alpha-amylase 2B	Ig gamma-2 chain C region (Fragment), Isoform of P01859	Ig alpha-2 chain C region (Fragment), Isoform of P01877
						Myeloid cell nuclear differentiation antigen	Cornifin-B	Ig gamma-1 chain C region, Isoform of P01857	BPI fold-containing family A member 2
						Isoform GN-1L of Glycogenin-1	Secretoglobin family 3A member 1	Ig gamma-4 chain C region (Fragment), Isoform of P01861	IgGFc-binding protein, Isoform of Q9Y6R7
						Isoform 1 of Neutrophil gelatinase-associated lipocalin	Isoform 1 of Serpin B13	Prolactin-inducible protein
						Vasodilator-stimulated phosphoprotein	Isoform 2A of Desmocollin-2	Ig lambda-2 chain C regions (Fragment), Isoform of P0CG05
						Adenylyl cyclase-associated protein	Alpha-2-macroglobulin-like protein 1	Alpha-amylase 1
						Ras-related C3 botulinum toxin substrate 2	Peptidyl-prolyl cis-trans isomerase B	Zymogen granule protein 16 homolog B
						Protein S100-A8	Ig heavy chain V-III region J
						Thymosin beta-4-like protein 3	Histone H2A type 1
						Histone H1.4	Cornulin
						Neutrophil collagenase	Heat shock protein beta-1
						Non-secretory ribonuclease	Protein FAM3D
						Leucine-rich alpha-2-glycoprotein	Titin, isoform CRA_a
						Isoform 1 of Phosphoglucomutase-1	Basic salivary proline-rich protein 2
						Peptidoglycan recognition protein 1	SPARC-like protein 1
						Matrix metalloproteinase-9	Tigger transposable element-derived protein 3
						Calponin-2	Isoform 1 of 14-3-3 protein sigma
						Adenine phosphoribosyltransferase	Isoform 1 of Interleukin-1 receptor antagonist protein
						Transforming protein RhoA	Uncharacterized protein C4orf40
						Isoform B1 of Heterogeneous nuclear ribonucleoproteins A2/B1	Mucin-5B
						Actin, cytoplasmic 1	Cystatin-B
						Glucose-6-phosphate isomerase	Protein-glutamine gamma-glutamyltransferase E
						Isoform 1 of Actin-related protein 2/3 complex subunit 5	Isoform 1 of WAP four-disulfide core domain protein 2
							Mucin-7
							Isoform 1 of Long palate, lung and nasal epithelium carcinoma-associated protein 1
							Isoform long of Serine protease inhibitor Kazal-type 5
							Isoform 1 of Clusterin
							Fatty acid-binding protein, epidermal
							Leukocyte elastase inhibitor
							Cystatin-SN
							Desmoglein-1
							Carbonic anhydrase 6
							Monocyte differentiation antigen CD14
							Uncharacterized protein
							Cystatin-C
							Cathepsin B
							Cysteine-rich secretory protein 3
							Isoform 1 of Deleted in malignant brain tumors 1 protein
							Desmoglein-3
							Polymeric immunoglobulin receptor
							Kallikrein-13
							IgGFc-binding protein
							Cystatin-SA
							Prolactin-inducible protein
							Isoform 2d of Voltage-dependent L-type calcium channel subunit beta-2
							Immunoglobulin J chain
							Isoform 1 of Kallikrein-11
							Short palate, lung and nasal epithelium carcinoma-associated protein 2

## Sheet: CP_UWS
Goncalves et al. 2010 (up) [39]	Goncalves et al. 2010 (down) [39]	Kim et al. 2010 (up) [40]	Kim et al. 2010 (down) [40]	Mertens et al. 2018 (up) [41]	Mertens et al. 2018 (down) [41]	Bostanci et al. 2018 (up) [42]	Bostanci et al. 2018 (down) [42]	Tang et al. 2019 (up) [44]	Tang et al. 2019 (down) [44]	Shin et al. 2019 (up) [45]	Shin et al. 2019 (down) [45]	Antezack et al. 2020 [47]	Antezack et al. 2020 [47]
Ig heavy chain V-III region	Cystatin-SN precursor	serum albumin	nil reported	hemopexin	glycoprotein-1	Band 3 anion transport protein	Isocitrate dehydrogenase [NADP] cytoplasmic	Ig kappa variable 4-1	nil reported	Neutrophil defensin 3	Nucleobindin-2	nil reported	nil reported
serum albumin		profilin I			plasminogen	ribonuclease R	Isoform 1 of Serpin B5	haptoglobin		Vitronectin	Poly [ADP-ribose] polymerase 4
alpha-amylase		amylase				Ras GTPase-activating-like protein IQGAP1	Isoform 1 of Histone deacetylase 5			Desmoplakin	Ig kappa chain V-III region GOL
						Proteasome activator complex subunit 2	Calmodulin-like protein 5			Vasodilator-stimulated phosphoprotein	Hemopexin
						metallo-beta-lactamase	Isoform 1 of Phospholipid transfer protein			Alpha-1B-glycoprotein	78 kDa glucose-regulated protein
							Titin			Kaliocin-1 (Fragment)	Constitutive coactivator of peroxisome proliferator-activated receptor gamma
							Interleukin-1 family member 6			Fibrinogen gamma chain	Cathepsin G
							Isoform 1 of Alpha-1-antichymotrypsin			Alpha-actinin-1	Peroxiredoxin-1
							Annexin A1			Fibrinogen beta chain	Peptidyl-prolyl cis-trans isomerase A
							Cellular retinoic acid-binding protein 2			Ig kappa chain V-III region B6	Glutamine--fructose-6-phosphate aminotransferase [isomerizing] 2
							Antileukoproteinase			Phospholipase B-like 1	Ig lambda chain V-III region SH
							Isoform 2A of Desmocollin-2			Myeloperoxidase	Alpha-2-macroglobulin-like protein 1
							Isoform 1 of Carboxylesterase 2			Cathelicidin antimicrobial peptide	Lactoperoxidase
							Basic salivary proline-rich protein 2			Transaldolase	Fructose-bisphosphate aldolase
							Isoform 1 of Extracellular matrix protein 1			Myosin-9	Protein disulfide-isomerase
							Peptidyl-prolyl cis-trans isomerase B			Protein S100-A9	Beta-2-microglobulin form pI 5.3 (Fragment)
							Monocyte differentiation antigen CD14			Protein S100-A8	Gelsolin
							Alpha-amylase 2B			Complement C3	Kallikrein-1
							Ig heavy chain V-III region J			Interferon-induced very large GTPase 1	Ig lambda chain V-IV region Hil
							Elafin			Prolactin-inducible protein	Uncharacterized protein
							Cornifin-B				Cystatin-B
							Isoform 1 of 14-3-3 protein sigma				Protein S100-A6 (Fragment)
							Isoform 2 of Cell division control protein 42 homolog				Putative DNA-binding protein inhibitor ID-2B
							Isoform 1 of Alpha-1-antitrypsin				Carbonic anhydrase 6
							Protein FAM3D				Immunoglobulin J chain (Fragment)
							Tubulin beta-2C chain				BPI fold-containing family B member 1
							Histatin-1				Zinc-alpha-2-glycoprotein
							Leukocyte elastase inhibitor				Ig mu chain C region
							Isoform 1 of WAP four-disulfide core domain protein 2
							Suprabasin
							Cysteine-rich secretory protein 3
							Heat shock protein beta-1
							Prolactin-inducible protein
							Carbonic anhydrase 6
							Desmoglein-1
							Cystatin-C
							Uncharacterized protein C4orf40
							Histone H2A type 1
							Desmoglein-3
							Ras-related C3 botulinum toxin substrate 2
							Cystatin-SA
							Isoform 1 of Long palate, lung and nasal epithelium carcinoma-associated protein 1
							Thioredoxin domain-containing protein 17
							Peroxiredoxin-6
							Mucin-5B
							Cystatin-S
							Isoform 2d of Voltage-dependent L-type calcium channel subunit beta-2
							Fatty acid-binding protein, epidermal
							Isoform 1 of Clusterin
							Polymeric immunoglobulin receptor
							Protein-glutamine gamma-glutamyltransferase E
							Cystatin-D
							Small proline-rich protein 2E
							Cornulin
							Short palate, lung and nasal epithelium carcinoma-associated protein 2
							Isoform long of Serine protease inhibitor Kazal-type 5
							Isoform 1 of Deleted in malignant brain tumors 1 protein
							Galectin-3-binding protein
							Kallikrein-13
							V3-4 protein (Fragment)
							Phosphatidylethanolamine-binding protein 1
							Nucleobindin-1

## Sheet: CP_SWS
Salazar et al. 2013 (up) [33]	Salazar et al. 2013 (down) [33]	Grant et al. 2019 (up) [43]	Grant et al. 2019 (down) [43]	Hartenbach et al. 2020 (up) [46]	Hartenbach et al. 2020 (down) [46]	Grant et al. 2022 (up) [27]	Grant et al. 2022 (down) [27]
S100-P	lactoperoxidase	Neutrophil defensin 1	Ribonuclease 7	cystatin-SA	Keratin, type I cytoskeletal 13	Haemoglobin subunit beta	Isoform V1 of Versican core protein
plastin-2		Histone H2A type 2A	Protachykinin 1	Salivary acidic PRP	Keratin, type I cytoskeletal 4	Haemoglobin subunit alpha	Salivary proline-rich protein 2 (Fragment)
neutrophil defensin		Histone H2B type 2E	β-Defensin 128	submaxillary gland androgen-regulated protein 3B	Keratin, type I cytoskeletal 2	Haemoglobin subunit delta	Isoform 2 of 14-3-3 protein sigma
Rho GDP-dissociation inhibitor 2		Histone H2B type F-S	Lipocalin 1		Keratin, type I cytoskeletal 9	AngRem52	Actin-like protein (Fragment)
catalase		Adrenomedullin	BPI fold-containing family B member 3		Keratin, type I cytoskeletal 16	Isoform 2 of Guanine nucleotide exchange factor for Rab-3A	Isoform 1 of 14-3-3 protein sigma
lactoferrin		Myeloperoxidase	Protachykinin 1		Cathepsin G	PRB3 protein	isoform 1 of long palate, lung and nasal epithelium carcinoma-associated protein 1
calreticulin		Eosinophil peroxidase			BPI fold-containing family B member 1	Haemoglobin subunit zeta	Thioredoxin
alpha-2-macroglobulin		Cathelicidin			Matrix metalloproteinase-9	Isoform 1 of Myosin-9	Cystatin-B
neutrophil collagenase					Annexin A1	Isoform 3 of Leukotriene A-4 hydrolase	Glutamate decarboxylase 2
adenylyl cyclase-associated protein 1					Transthyretin	Protein S100-A8	basic salivary proline-rich protein 1 isoform 3 preproprotein
alpha-2-HS-glycoprotein					Alpha-2-macroglobulin-like protein 1	Coatomer subunit gamma-2	Triosephosphate isomerase
ceruloplasmin					Metalloproteinase inhibitor 1	DNA methyltransferase	Mucin 5AC, oligomeric mucus/gel-forming
profilin-1					Apolipoprotein A-I	Moesin	Fatty acid-binding protein, epidermal
MMP-9					Albumin	Isoform 2 of NADPH oxidase activator 1	Isoform 1 of Acyl-CoA-binding protein
fibrinogen alpha chain					Hemopexin	Protein S100-A9	uncharacterized protein
complement C3					Cornulin	Alpha-N-acetylgalactosaminidase	uncharacterized protein
peptidoglycan recognition protein 1					Catalase	Profilin-1	uncharacterized protein
gelsolin					Protein disulfide-isomerase	Histatin-1	uncharacterized protein
leukotriene A1 hydrolase					Protein-glutamine gamma-glutamyltransferase E	Chloride intracellular channel protein 1	Airway lactoperoxidase
					Fructose-bisphosphate aldolase C	Isoform 2 of Lysophospholipid acyltransferase LPCAT4	uncharacterized protein
					Keratin, type I cytoskeletal 10	Submaxillary gland androgen-regulated protein 3B	Isoform 2 of WAP four-disulfide core domain protein 2
					Cofilin-1	Cystatin-SA	cDNA FLJ51275
					Calmodulin-like protein 3	Non-secretory ribonuclease	Isoform 3 of WD repeat- and FYVE domain-containing protein 4
					Leukocyte elastase inhibitor	Plastin-2	PR domain zinc finger protein 2 isoform c
					Rho GDP-dissociation inhibitor 2	Vimentin variant 3	uncharacterized protein
						Glyceraldehyde-3-phosphate dehydrogenase	Angiotensinogen
						Statherin	Isoform 3 of Contactin-associated protein-like 3B
						Transketolase	Similar to VH4 heavy chain variable region precursor
						Protein S100-A12	uncharacterized protein
						Isoform 3 of Keratin, type I cytoskeletal 13	Beta-2-microglobulin
						Vasodilator-stimulated phosphoprotein	Short palate, lung and nasal epithelium carcinoma-associated protein 2
						Thymosin beta-4-like protein 3	uncharacterized protein
						cDNA FLJ57283, highly similar to Actin, cytoplasmic 2	Isoform 4 of Interleukin-1 receptor antagonist protein
						Phosphoglycerate kinase	Isoform 5 of Deleted in malignant brain tumors 1 protein
						Protein S100-A6	Isoform 7 of Deleted in malignant brain tumors 1 protein
						uncharacterized protein	Alpha-amylase 2B
						glycogen phosphorylase, liver form isoform 2	vitamin D-binding protein isoform 1 precursor
						Similar to Immunglobulin heavy chain variable region	cDNA FLJ14473 fis, clone MAMMA1001080, highly similar to Homo sapiens SNC73 protein (SNC73) mRNA
						Neutrophil elastase	Putative uncharacterized protein DKFZp686G21220 (Fragment)
						Protein S100-P	UPF0762 protein C6orf58
						cDNA FLJ78387	Protein
						uncharacterized protein	cDNA FLJ53963, highly similar to Leukocyte elastase inhibitor
						uncharacterized protein	uncharacterized protein
						Glyceraldehyde-3-phosphate dehydrogenase	Similar to Rheumatoid factor G9 heavy chain
						44 kDa protein	Conserved hypothetical protein
						cDNA FLJ57374	Alpha-amylase 1
						9 kDa protein	Protein S100-A11
						basic salivary proline-rich protein 4 precursor	Similar to Keratin 16
						peroxiredoxin-5, mitochondrial isoform c precursor	Isoform 2 of Triosephosphate isomerase
						Glucose-6-phosphate isomerase	uncharacterized protein
						Similar to Cold agglutinin FS-1 H-chain	Immunoglobulin J chain
						uncharacterized protein	Similar to Hepatitis B virus receptor binding protein
						Matrix metalloproteinase-9	uncharacterized protein
						Isoform Short of 14-3-3 protein beta/alpha	uncharacterized protein
						Isoform Cytoplasmic+peroxisomal of Peroxiredoxin-5, mitochondrial	Isoform 1 of Triosephosphate isomerase
						Conserved hypothetical protein	Basic salivary proline-rich protein 1
						POTE ankyrin domain family member I	24 kDa protein
						Putative uncharacterized protein DKFZp686P15220	Bactericidal/permeability-increasing protein-like 1
						archaemetzincin-2 isoform 2	Immunglobulin heavy chain variable region
						uncharacterized protein	cDNA FLJ41981 fis, clone SMINT2011888, highly similar to Protein Tro alpha1 H,myeloma
						uncharacterized protein	cDNA, FLJ79516, highly similar to 14-3-3 protein zeta/delta
						uncharacterized protein	Caspase-14
						uncharacterized protein	Zinc-alpha-2-glycoprotein
						uncharacterized protein	Ig lambda-3 chain C regions
						Adenylyl cyclase-associated protein	cDNA FLJ60163, highly similar to Carbonic anhydrase 6
						Cathepsin G	uncharacterized protein
						uncharacterized protein	Protein
						106 kDa protein	Keratin, type I cytoskeletal 15
						cysteine-rich secretory protein 3 isoform 1 precursor	Polymeric immunoglobulin receptor
						cDNA FLJ54081, highly similar to Keratin, type II cytoskeletal 5	Keratin, type II cytoskeletal 2 epidermal
						uncharacterized protein	Epithelial membrane protein 2
						Similar to Ig kappa chain V-III region VG precursor	uncharacterized protein
						UDP-GlcNAc:betaGal beta-1,3-N-acetylglucosaminyltransferase 3	Keratin, type I cytoskeletal 14
						Isoform alpha-enolase of Alpha-enolase	14-3-3 protein zeta/delta
						Isoform 3 of Alpha-1-antitrypsin	Putative uncharacterized protein DKFZp686L19235
						IGK@ protein	Putative uncharacterized protein (Fragment)
						Arylsulfatase F	Isoform 2 of Ribonucleoprotein PTB-binding 2
						uncharacterized protein	cDNA FLJ55140, highly similar to SPARC-like protein 1
						uncharacterized protein	3-isopropylmalate dehydratase large subunit (Fragment), Streptococcus gordonii
						Ig kappa chain V-III region VG (Fragment)	uncharacterized protein
						Adenylyl cyclase-associated protein	13 kDa protein
						Isoform 1 of Alpha-1-antitrypsin	Isoform SV of 14-3-3 protein epsilon
						NEDD8	Bardet-Biedl syndrome 10 protein
						uncharacterized protein	Putative uncharacterized protein
						Immunglobulin heavy chain variable region	Elongation factor Tu, Campylobacter hominis
						uncharacterized protein	Anti-(ED-B) scFV (Fragment)
						22 kDa protein	uncharacterized protein
						6-phosphogluconate dehydrogenase, decarboxylating	Pyruvate kinase
						Alpha-1-acid glycoprotein 1
						34 kDa protein
						fibrinogen beta chain isoform 2 preproprotein
						6-phosphogluconate dehydrogenase, decarboxylating
						Cystatin-S
						Beta-actin-like protein 2
						Isoform 1 of Actin-related protein 3C
						Fibrinogen beta chain
						Isoform 2 of UPF0585 protein C16orf13
						Histone H2B type 2-E
						Ig kappa chain V-IV region JI
						Similar to Myosin-reactive immunoglobulin heavy chain variable region
						Peptidoglycan recognition protein 1
						Haptoglobin
						Lysozyme C
						FGB protein (Fragment)
						Suprabasin
						Proteasome subunit alpha type-5
						uncharacterized protein
						uncharacterized protein
						Alpha-actinin 1
						cDNA FLJ36348 fis, clone THYMU2007025, highly similar to TRANSKETOLASE
						Transaldolase
						cDNA FLJ56822, highly similar to Alpha-2-HS-glycoprotein
						IGL@ protein
						Hemopexin
						Keratin, type II cytoskeletal 1
						Isoform 3 of Protein FAM194A
						Alpha-1-acid glycoprotein 2
						Peptidyl-prolyl cis-trans isomerase
						Ig kappa chain V-III region GOL
						Isoform 1 of Neutrophil gelatinase-associated lipocalin
						Protein-glutamine gamma-glutamyltransferase E
						31 kDa protein
						uncharacterized protein
						haptoglobin isoform 2 preproprotein
						Immunoglobulin heavy chain
						Mucin-7
						Putative uncharacterized protein DKFZp686M24218
						Complement C3 (Fragment)
						Desmoglein-2
						Isoform 4 of uncharacterized protein C5orf25
						Putative uncharacterized protein DKFZp686C15213
						uncharacterized protein
						Putative uncharacterized protein DKFZp686E23209
						Basic salivary proline-rich protein 2
						FGA protein (Fragment)
						Isoform 1 of Immunoglobulin lambda-like polypeptide 5
						Peptidyl-prolyl cis-trans isomerase A
						10 kDa protein
						uncharacterized protein
						Isoform 1 of L-lactate dehydrogenase A chain
						Isoform H14 of Myeloperoxidase
						Isoform 3 of Apoptosis-associated speck-like protein containing a CARD
						uncharacterized protein
						Putative uncharacterized protein
						Lambda light chain of human immunoglobulin surface antigen-related protein (Fragment)
						Protein
						Protein disulfide-isomerase
						16 kDa protein
						cDNA FLJ44586 fis, clone ASTRO2015162, highly similar to Choline transporter-like protein 2
						Putative uncharacterized protein DKFZp686I04196 (Fragment)
						cDNA FLJ54408, highly similar to Heat shock 70 kDa protein 1
						Zymogen granule protein 16 homolog B
						Zinc transport system membrane protein troD, Treponema pallidum
						uncharacterized protein
						cDNA FLJ25678 fis, clone TST04067, highly similar to PURINE NUCLEOSIDE PHOSPHORYLASE
						uncharacterized protein
						AZU1 protein (Fragment)
						Prolactin-inducible protein
						Similar to Ig kappa chain V-III region WOL
						Coiled-coil domain-containing protein 86
						Isoform 2 of Alpha-actinin-1
						cDNA FLJ52843, highly similar to Histone H3.3
						cDNA FLJ59430, highly similar to Protein disulfide-isomerase
						Immunglobulin heavy chain variable region (Fragment)
						Histone H4
						Salivary acidic proline-rich phosphoprotein 1/2
						uncharacterized protein
						Keratin, type I cytoskeletal 16
						Cystatin-SN
						Putative uncharacterized protein DKFZp686G11190
						Isoform 2 of Granulins
						Cystatin-D
						Macrophage migration inhibitory factor
						uncharacterized protein
						histone H2A.V isoform 2
						Glutathione S-transferase P
						uncharacterized protein
						Isoform M2 of Pyruvate kinase isozymes M1/M2
						rab GDP dissociation inhibitor beta isoform 2
						Full-length cDNA clone CS0DD006YL02 of Neuroblastoma of Homo sapiens
						cDNA FLJ36533 fis, clone TRACH2004428, highly similar to Lactotransferrin (Fragment)
						Cystatin-C
						Histone H2A
						Fructose-bisphosphate aldolase A
						titin isoform N2-B
						Protein
						Transcobalamin-1
						Serotransferrin
						Pituitary tumor transforming gene protein
						cDNA FLJ51535, highly similar to Phosphatidylethanolamine-binding protein 1
